# Supplementary figures and images for: Best Practices: The Washington Heights Community Service Model: Positive Outcomes and Implications for Reimbursement Under the ACA
Source: Atypon-hosted journal article supplement (doi:10.1176/appi.ps.201300519), 2014-03-01

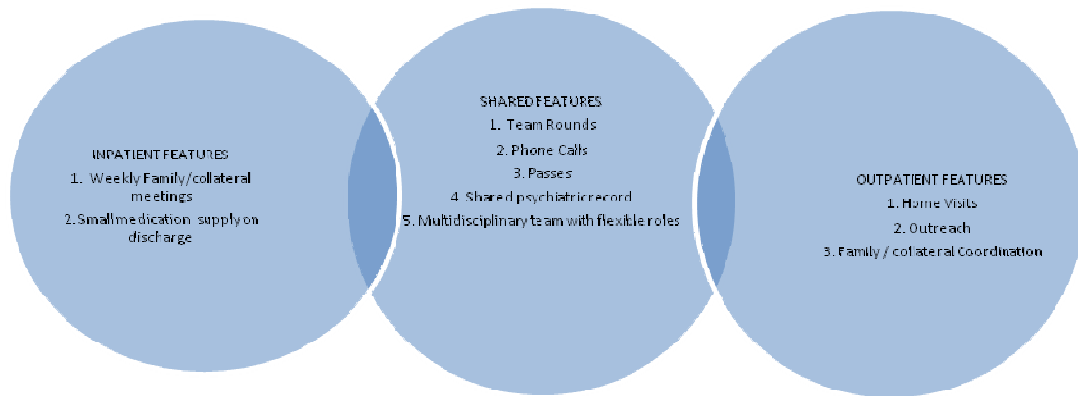

Supplement: 284_ds001.pdf [file 284_ds001.pdf]
